# Supplementary material
Source: Research Square preprint supplement (doi:10.21203/rs.3.rs-9099737/v1)
Supplement: Supplementary file 2 [file 9b76767a208762bfe63f9384.docx]

Supplementary Material

**Identifying pyroptosis-related molecular subtypes in asthma through gene expression profiles: implications for airway inflammation**

Min Li**1**†, Jiayao Guo**1**, Xianmei Li2, Jialin Zheng**1** , Weimin Yang3, Zhuang Luo**1***, Wenye Zhu4*

1Department of Respiratory and Critical Care Medicine, First Affiliated Hospital of Kunming Medical University

2Department of Respiratory and Critical Care Medicine, Dehong Prefecture People's Hospital

3Yunnan Key Laboratory of Pharmacology for Natural Products, Kunming Medical University

4Department of Pharmacy, First Affiliated Hospital of Kunming Medical University, Kunming, China

***Correspondence**:

Wenye Zhu, M.M. Department of Pharmacy, First Affiliated Hospital of Kunming Medical University, No. 295 Xichang Road,Wuhua District, Kunming, Yunnan, 650032, China, Tel/fax: +86 0871 65324888 2512; e-mail: [Lily1124leaf@163.com](mailto:Lily1124leaf@163.com).

Zhuang Luo, Ph.D Department of Respiratory and Critical Care Medicine, The First Affiliated Hospital of Kunming Medical University, No. 295 Xichang Road, Wuhua District, Kunming, Yunnan, 650032, China, Tel/fax: +86 0871 65324888 2512; e-mail: skyny4511@126.com

**Supplementary Tables**

| **Table S1. Gene list of 372 pyroptosis-related genes (PRGs) with a GIFtS above 30** | | | | | | | |
| --- | --- | --- | --- | --- | --- | --- | --- |
| ABL1 | CALM2 | DNMT3B | HSP90AB1 | MUC20 | PTEN | STAT5A | USP48 |
| ACE2 | CALM3 | DPEP1 | HSP90B1 | MYD88 | PTGS2 | STK4 | USP8 |
| ACSM3 | CAMP | DPP8 | HTRA1 | NAIP | PTPN11 | STXBP1 | USP9X |
| ACTN4 | CAPN1 | DPP9 | HUWE1 | NCR1 | PTX3 | STXBP2 | UTS2 |
| ADIPOQ | CARD8 | DRD2 | ICAM1 | NEDD4 | PVALB | STXBP3 | VCAM1 |
| ADORA1 | CASP1 | DUOX1 | IFI16 | NEK7 | PYCARD | SUGT1 | VDR |
| ADORA2B | CASP10 | E2F4 | IFI27 | NFE2L2 | RAB5A | SUZ12 | VEGFA |
| ADORA3 | CASP3 | EED | IFIH1 | NFKB1 | RASGRF1 | SYVN1 | VIM |
| AGER | CASP4 | EEF2K | IFNB1 | NFKBIA | RBBP4 | TAC1 | VPS28 |
| AHSA1 | CASP5 | EGFR | IGF2BP3 | NFS1 | RBBP7 | TACR1 | VPS4B |
| AIM2 | CASP6 | ELAVL1 | IKBKE | NINJ1 | RBM26 | TCEA3 | VTN |
| AKT1 | CASP7 | EPHA2 | IKBKG | NLRC4 | RBMX | TFAM | WFDC12 |
| ALK | CASP8 | ETS1 | IKZF1 | NLRP13 | RELA | TFAP2A | XPNPEP1 |
| ALOX15 | CASP9 | EZH2 | IL13 | NLRP2 | RIPK1 | TFG | YAF2 |
| AMIGO2 | CCL5 | FADD | IL13RA2 | NLRP3 | RIPK3 | TIFA | YTHDF2 |
| ANLN | CD14 | FCGRT | IL17A | NLRP6 | ROCK1 | TLR2 | YWHAE |
| ANXA1 | CD274 | FGF21 | IL18 | NLRP7 | RPL27A | TLR3 | YWHAZ |
| ANXA2 | CD55 | FGF5 | IL18BP | NLRP9 | RPL3 | TLR4 | ZBP1 |
| APAF1 | CDC37 | FKBP10 | IL1A | NLRX1 | RPL7A | TLR8 | ZDHHC1 |
| APIP | CDK9 | FLNA | IL1B | NOS1 | RPS19 | TLR9 | ZEB2 |
| APOA1 | CDKN1B | FLOT1 | IL1RN | NR1H2 | RRBP1 | TNF | ZNF329 |
| APOE | CEBPB | FMR1 | IL27 | NR4A1 | RSL1D1 | TNFRSF11B | ZNF532 |
| APOL1 | CHI3L1 | FNDC4 | IL32 | ORMDL3 | S100A12 | TNFSF13B |  |
| ATF6 | CHMP2A | FNDC5 | INPP5D | OSM | S100A4 | TOMM20 |  |
| ATG3 | CHMP2B | FOXP3 | IQGAP1 | P2RX7 | S100A8 | TP53 |  |
| ATG5 | CHMP4A | FSTL1 | IRAK3 | P4HA1 | S100A9 | TPM3 |  |
| ATG7 | CHMP4B | GABARAP | IRF1 | PAH | SDHB | TRAF2 |  |
| ATOH8 | CHMP4C | GABARAPL1 | IRF2 | PAK2 | SEC22B | TRAF3 |  |
| ATP6AP1 | CHMP6 | GABRG3 | IRF3 | PANX1 | SERPINB1 | TRAF6 |  |
| AXL | CHMP7 | GALNS | JUN | PARP1 | SERPINC1 | TREM1 |  |
| BAK1 | CITED2 | GATA1 | KIF23 | PCSK9 | SERPINH1 | TREM2 |  |
| BAX | CLEC3B | GBP1 | LCN2 | PDCD6IP | SESN2 | TRIM21 |  |
| BCL2 | CLEC5A | GBP2 | LMNA | PECAM1 | SETD7 | TRIM24 |  |
| BCL6 | CMA1 | GBP3 | LRPPRC | PEPD | SIRT1 | TRIM25 |  |
| BECN1 | CNR1 | GBP5 | LY96 | PGF | SIRT3 | TRIM31 |  |
| BIRC2 | COL2A1 | GGT1 | LYST | PINK1 | SIRT6 | TRPA1 |  |
| BIRC3 | CPA3 | GJA1 | MALT1 | PKN2 | SLC16A4 | TRPM2 |  |
| BNIP3 | CRKL | GLMN | MAP2K6 | PLA2R1 | SLC30A7 | TSLP |  |
| BNIP3L | CRTAC1 | GNA15 | MAP3K7 | PLAUR | SLC4A2 | TUBB6 |  |
| BRCA1 | CSNK1A1 | GSK3B | MAPK11 | POLA2 | SMAD2 | TXNIP |  |
| BRCC3 | CSTB | GSTO1 | MAPK14 | POP1 | SMC4 | UBE2D2 |  |
| BRD4 | CTSG | GSTP1 | MDM2 | PPARG | SNIP1 | UBE2D3 |  |
| BSG | CUL4B | GZMA | MEFV | PPIC | SNRK | UBR2 |  |
| BST2 | CYBB | GZMB | MELK | PRDM1 | SNRPN | UCP1 |  |
| BTK | CYCS | HDAC2 | METTL3 | PRF1 | SOCS1 | ULK1 |  |
| BTN3A1 | DDX3X | HDAC6 | MIB1 | PRG2 | SQSTM1 | USF2 |  |
| C10orf55 | DGCR8 | HKDC1 | MKI67 | PRIM1 | SRPK1 | USP14 |  |
| CA1 | DHX8 | HP | MLKL | PRMT5 | SSR1 | USP18 |  |
| CALM1 | DHX9 | HSF1 | MMP9 | PROM2 | STAT2 | USP25 |  |
| DNMT3A | DNMT1 | HSP90AA1 | MST1 | PRTN3 | STAT3 | USP47 |  |

| **Table S2**. Baseline characteristics of the pyroptosis related clusters in the validation dataset（GSE45111） | | | | |
| --- | --- | --- | --- | --- |
| **Characteristics** | **Cluster 1** | **Cluster 2** | ***t/z*/χ2** | ***P-*Value** |
| N | 21 | 26 | - | - |
| Age, years, median (Q1,Q3) | 63 (57, 68) | 56 (43, 66) | 2.164 | 0.031 |
| Gender, n(%) |  |  | 0.302 | 0.583 |
| Male | 8 (38.0) | 12 (46.1) |  |  |
| Female | 13 (61.9) | 14 (53.8) |  |  |
| Inflammation type（%） |  |  | 8.193 | 0.004 |
| Paucigranulocytic asthma | 1 (4.7) | 17 (65.4) |  |  |
| Non-Paucigranulocytic asthma | 20 (95.2) | 9 (34.6) |  |  |
| Eosinophilic asthma | 11 (52.3) | 6 (23.0) |  |  |
| Neutrophilic asthma | 9 (42.8) | 3 (11.5) |  |  |
| Mixed granulocytic asthma | 0 (0) | 0 (0) |  |  |

**Supplementary Figures**
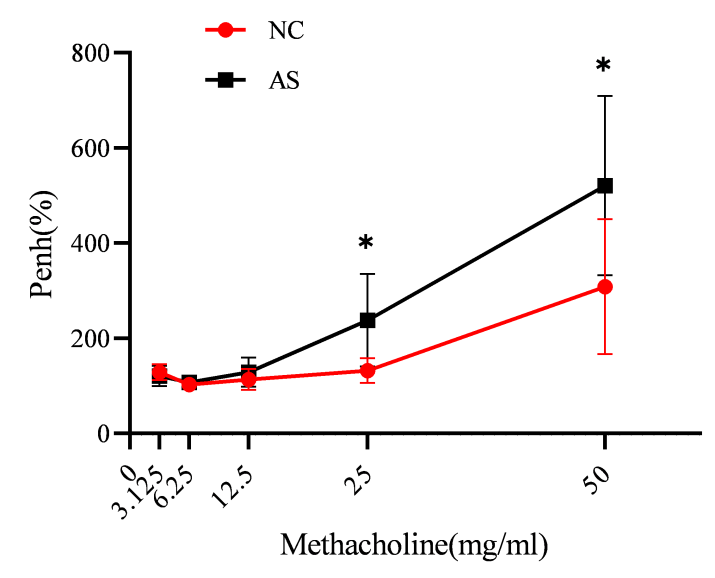


**Figure S1.** Airway responsiveness of two groups of mice was implied by measuring Penh in response to increasing concentrations of methacholine. **P< 0.05.*

**Figure S2.**
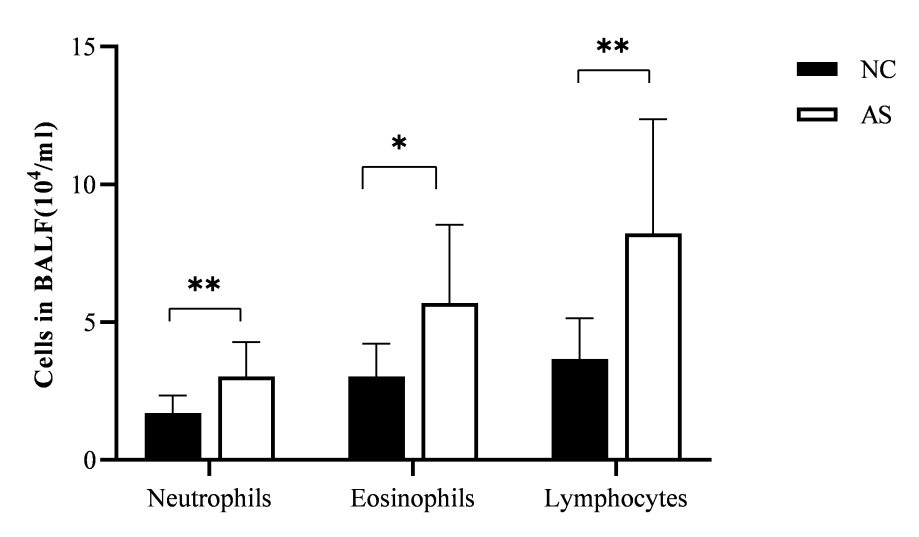
Inflammatory cell analysis in BALF including neutrophils, eosinophils, and Lymphocytes. **P< 0.05,**P< 0.01.*


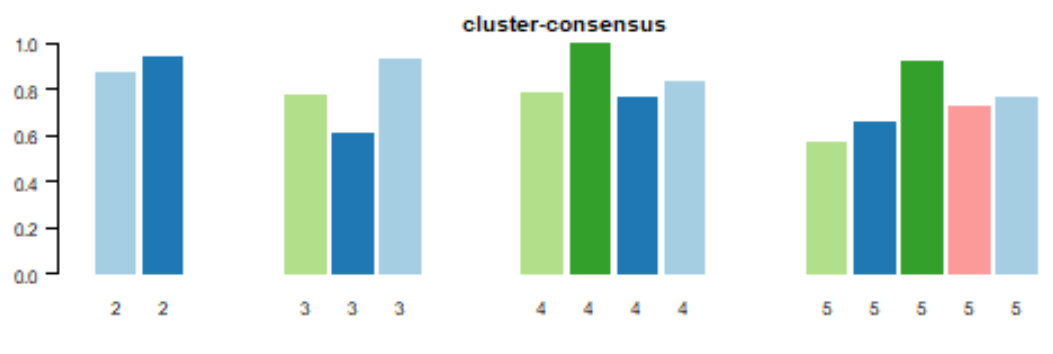


**Figure S3.** Cluster-consensus score bar-plot of the validation dataset. The bar-plot represents the consensus scores for subgroups with cluster count (k) ranging from 2 to 8.


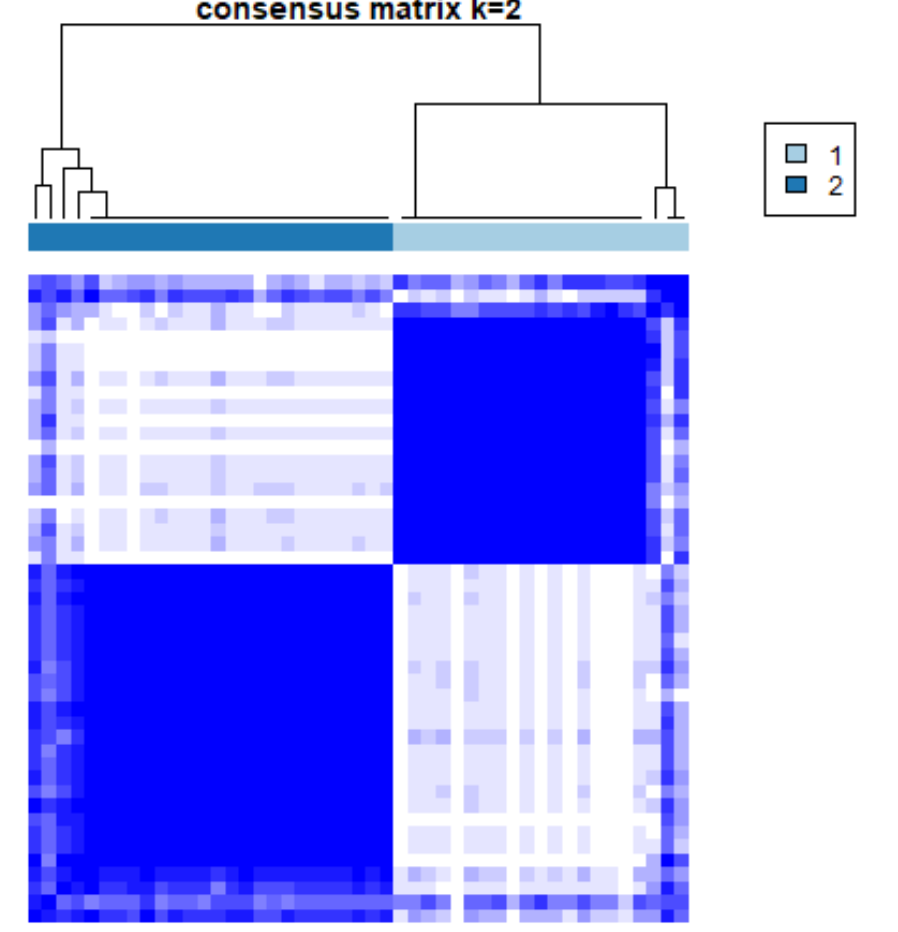


**Figure S4.** Consensus matrix heatmap of the validation dataset (GSE45111). The color-coded heatmap represents the consensus matrix with consensus k=2, which was determined by the minimal consensus scores for subgroups (>0.8). Color gradients represent consensus values from zero to1. White corresponds to 0 and dark blue to 1.
