# Supplementary material
Source: Research Square preprint supplement (doi:10.21203/rs.3.rs-9099737/v1)

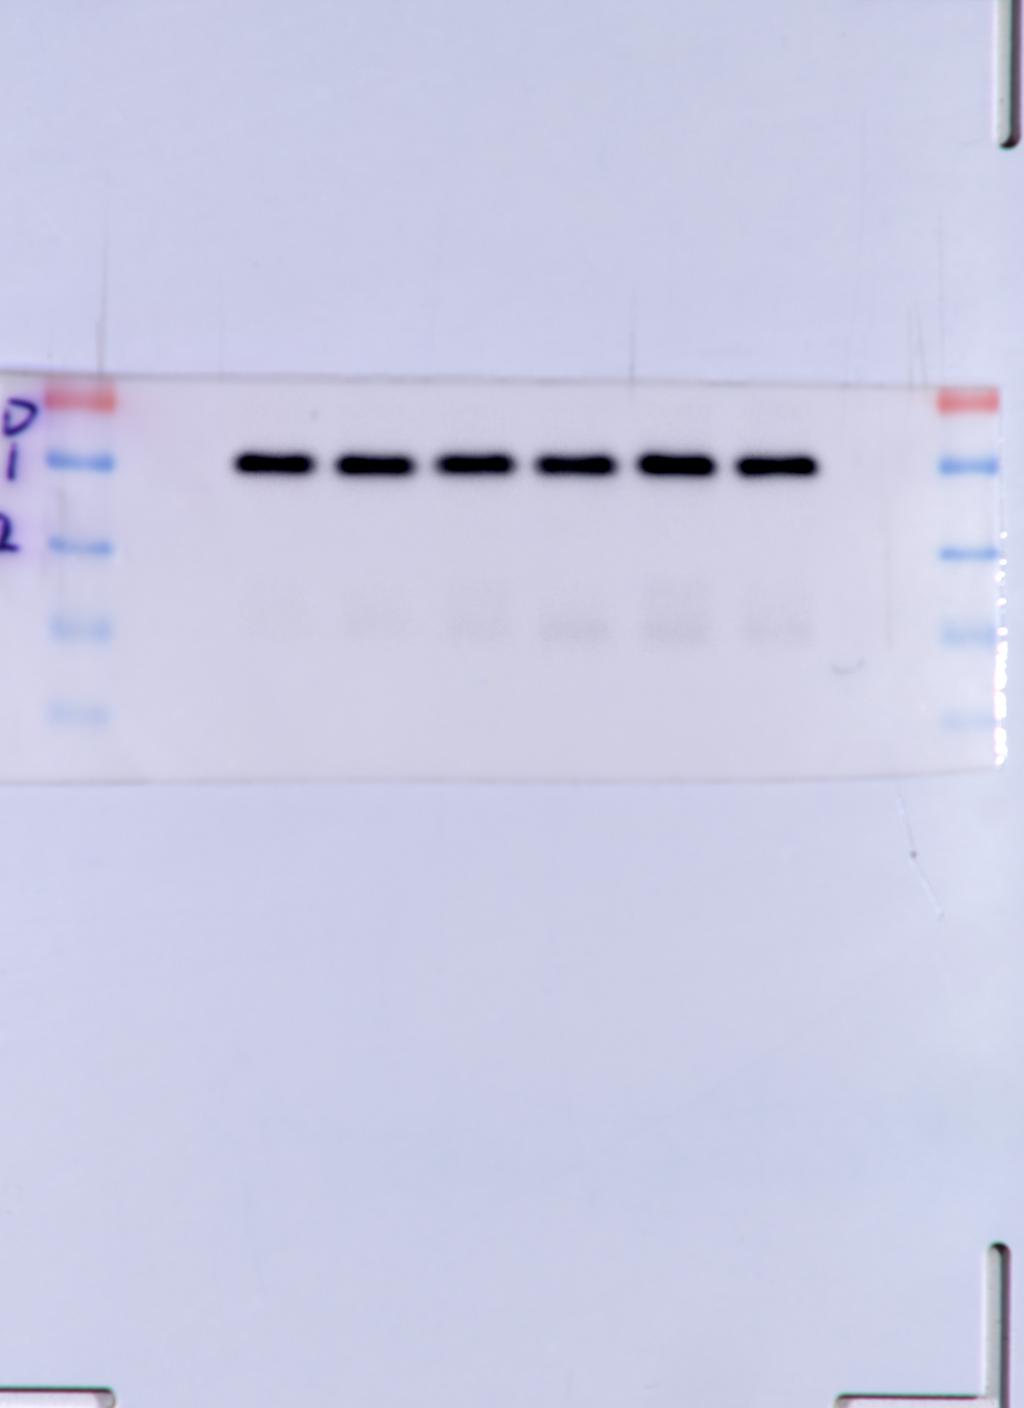


GSDMD


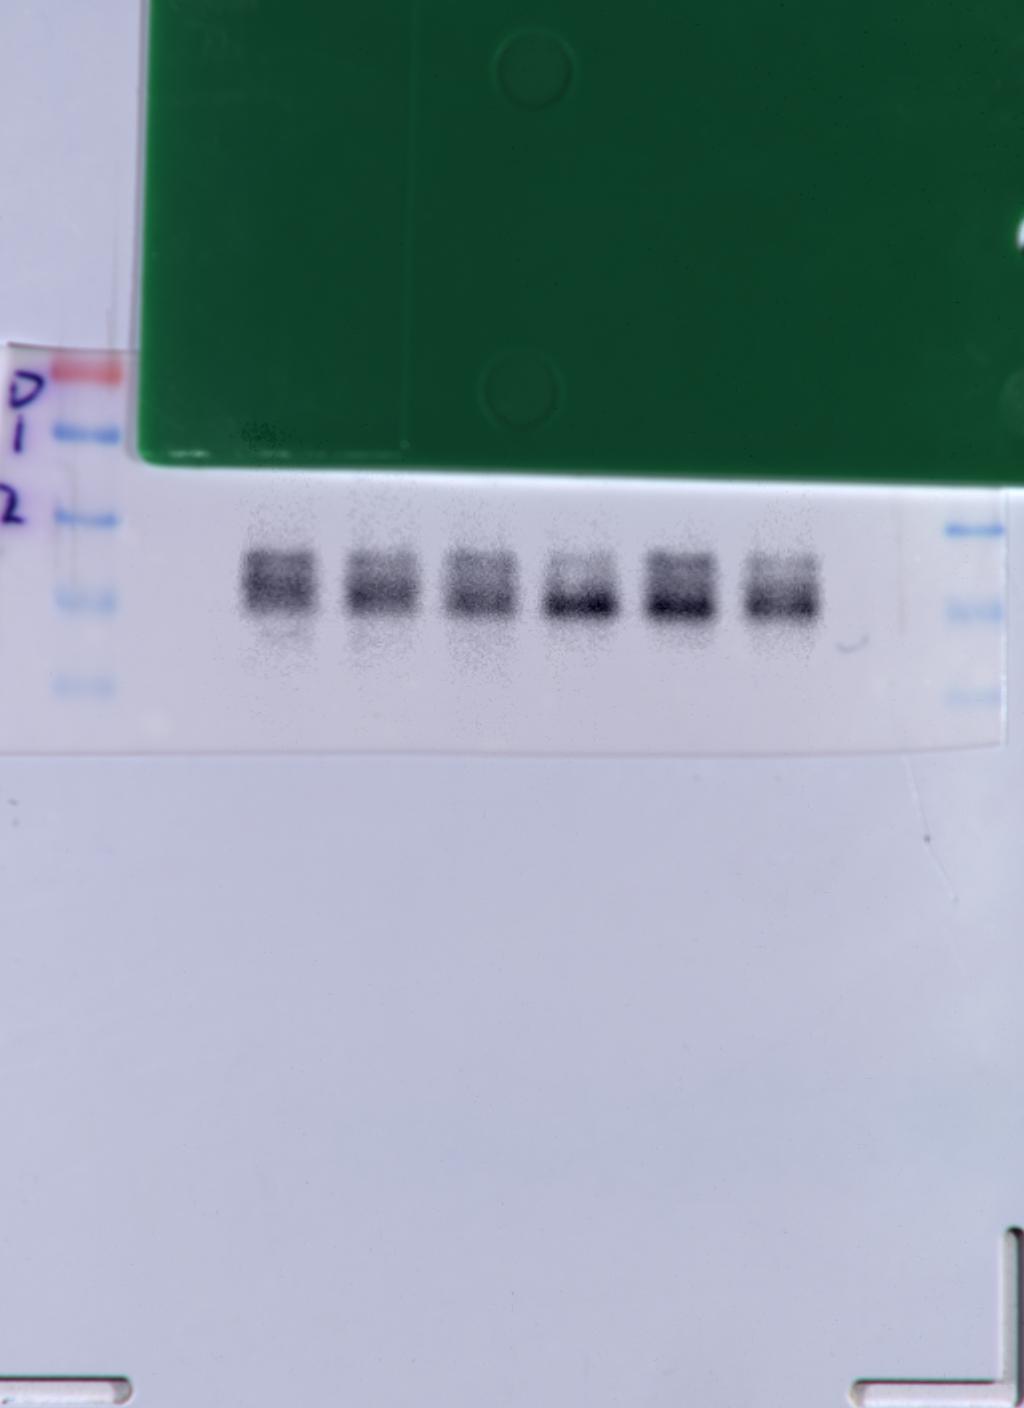


GSDMD-N


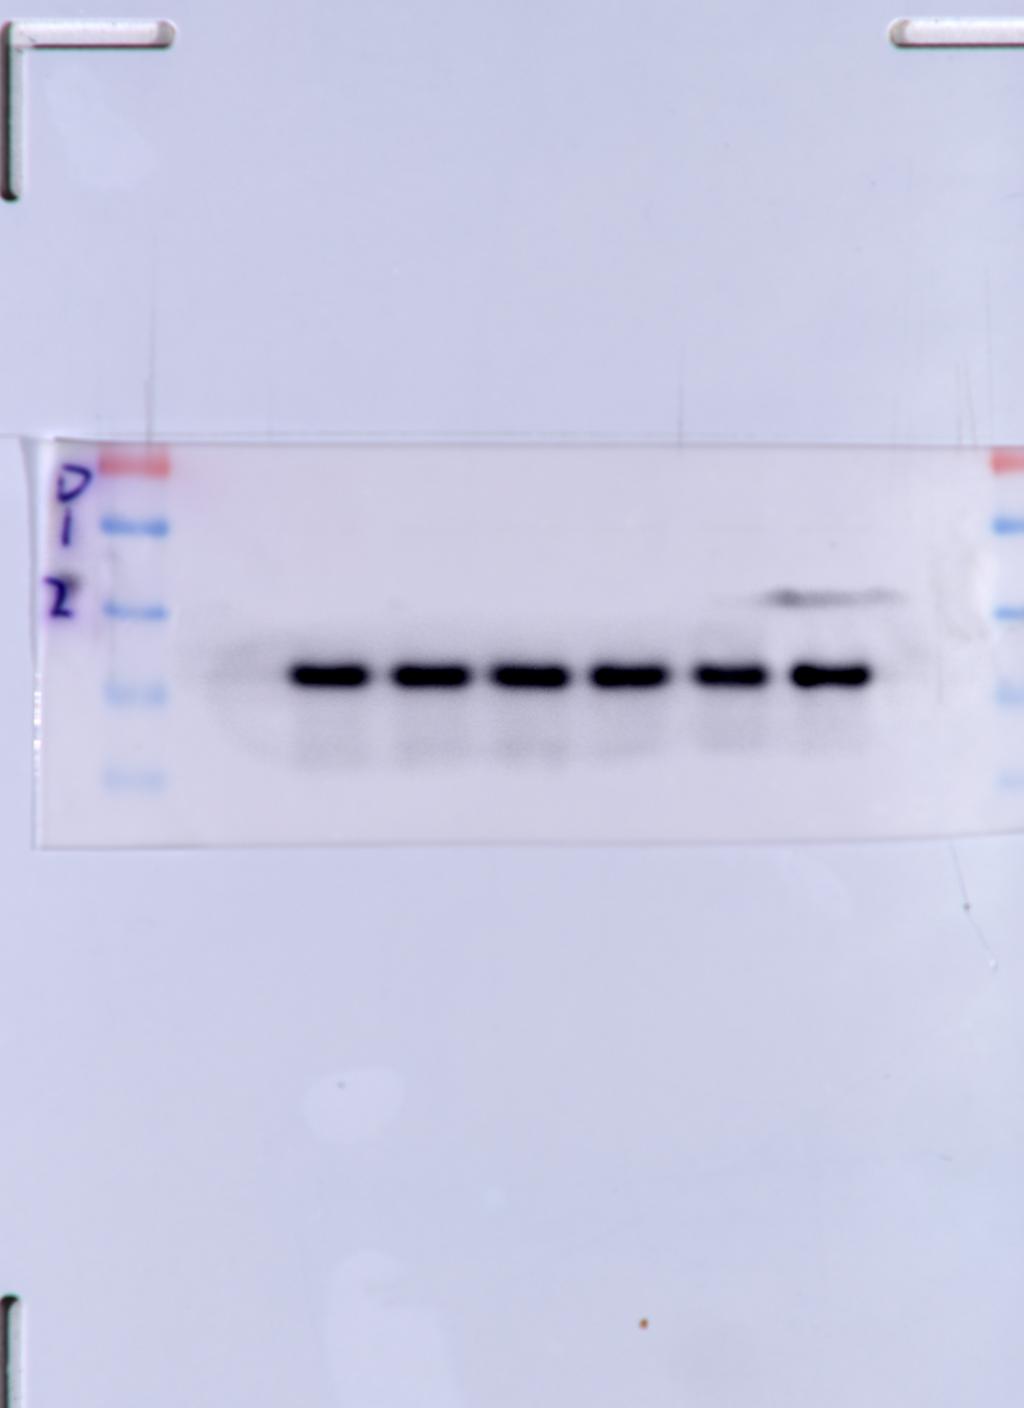


GAPDH

Supplement: Supplementary file 1 [file 2697247ad24764d7d3e8e761.doc]
